# Supplementary material
Source: PubMed Central journal article supplement (PMC4753048)

# Theoretical

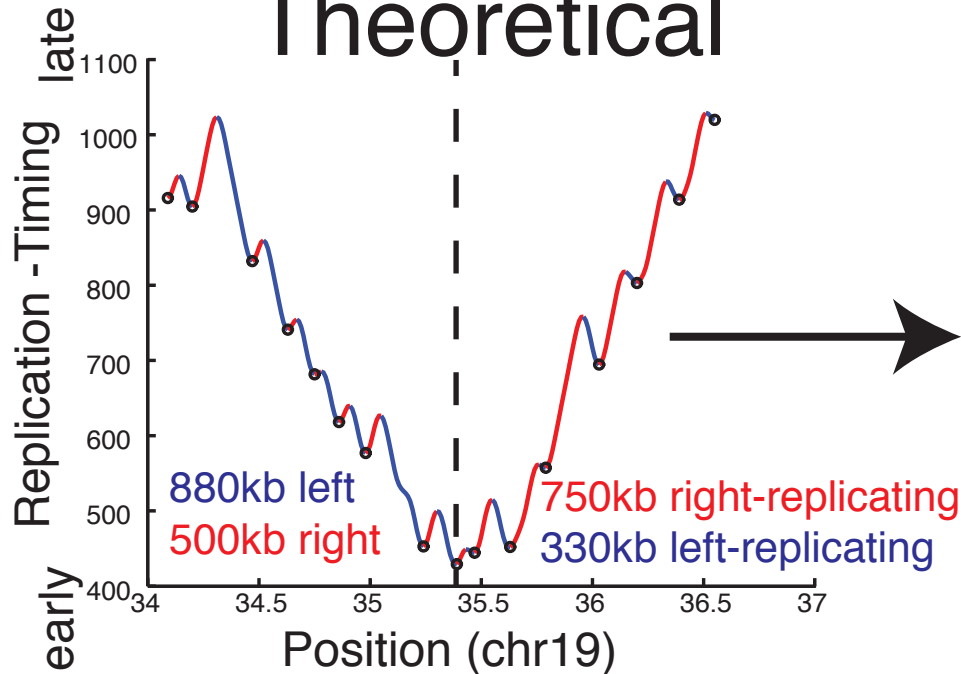

# Observed

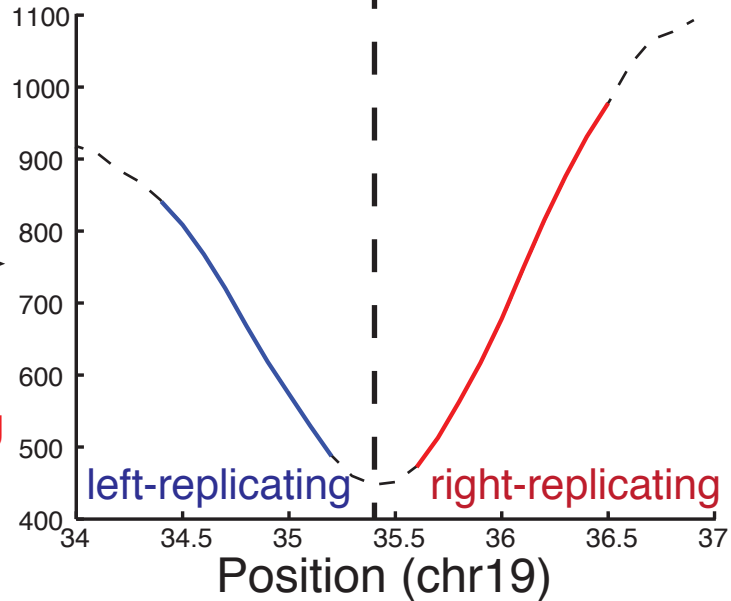

Supplement: NIHMS748835-supplement-1.pdf [file NIHMS748835-supplement-1.pdf]

$\text{Log}_2$  Ratio C>A:G>T POLE Mutations

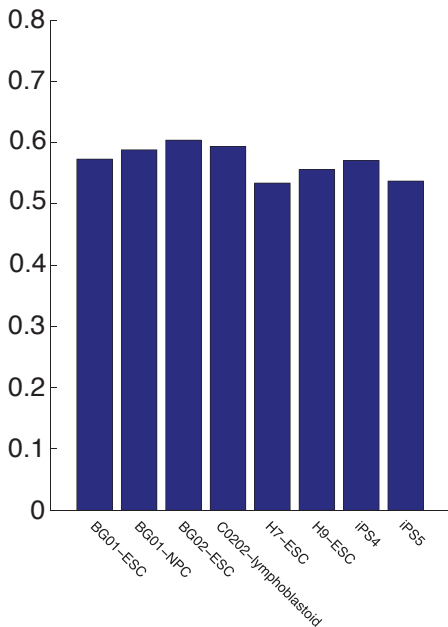

Replicating Timing Cell Line

Supplement: NIHMS748835-supplement-2.pdf [file NIHMS748835-supplement-2.pdf]

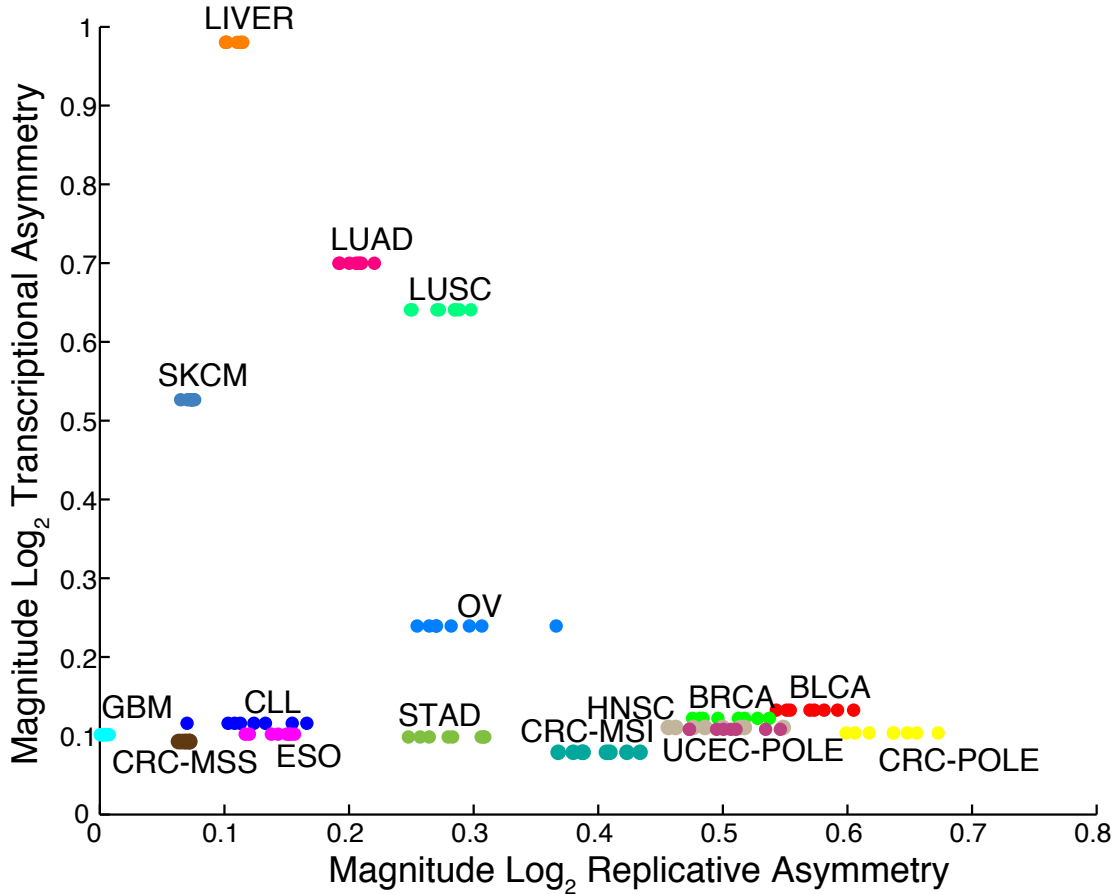

Supplement: NIHMS748835-supplement-3.pdf [file NIHMS748835-supplement-3.pdf]

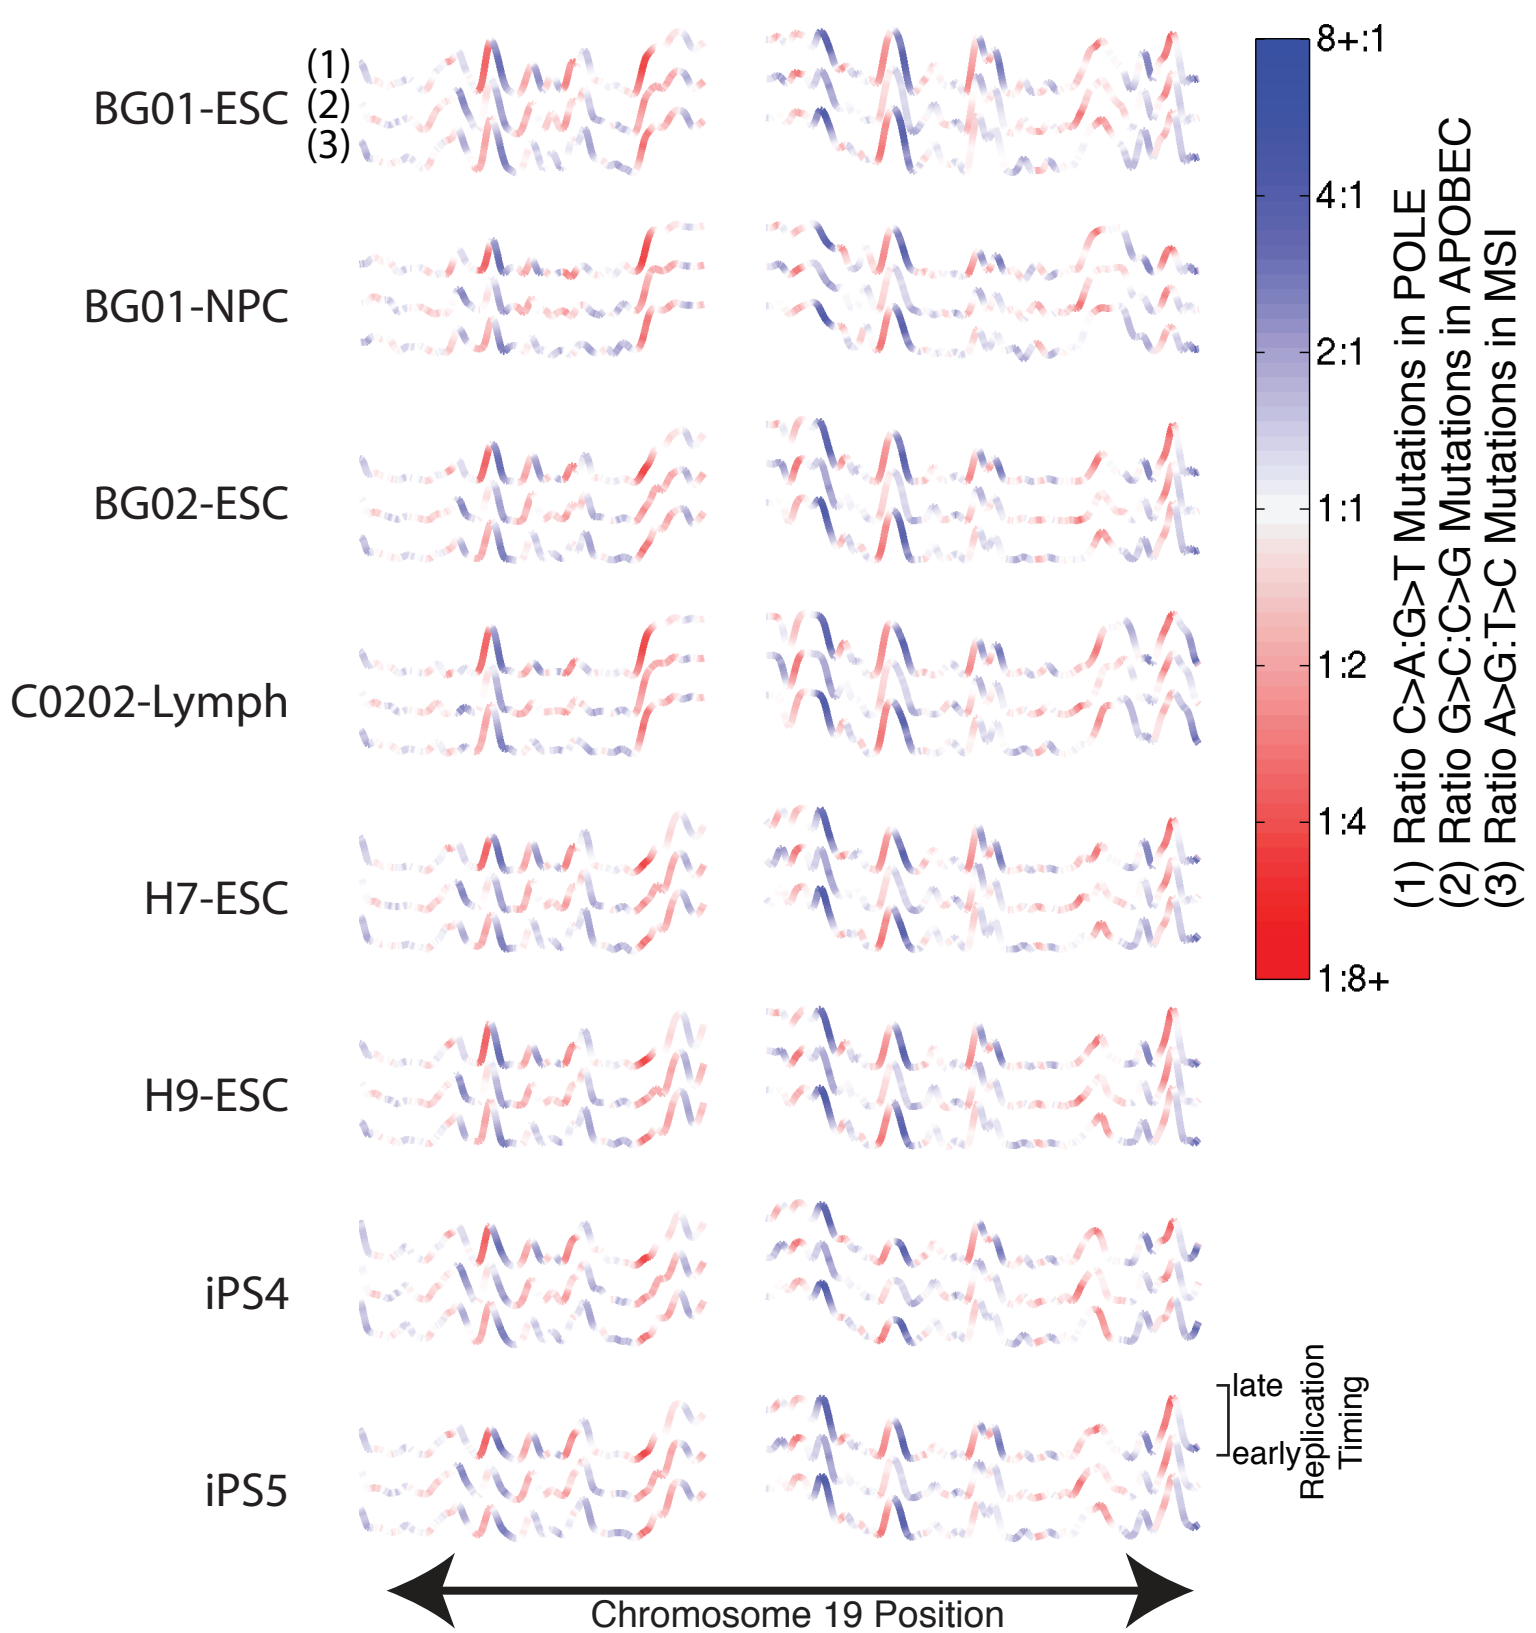

Supplement: NIHMS748835-supplement-4.pdf [file NIHMS748835-supplement-4.pdf]

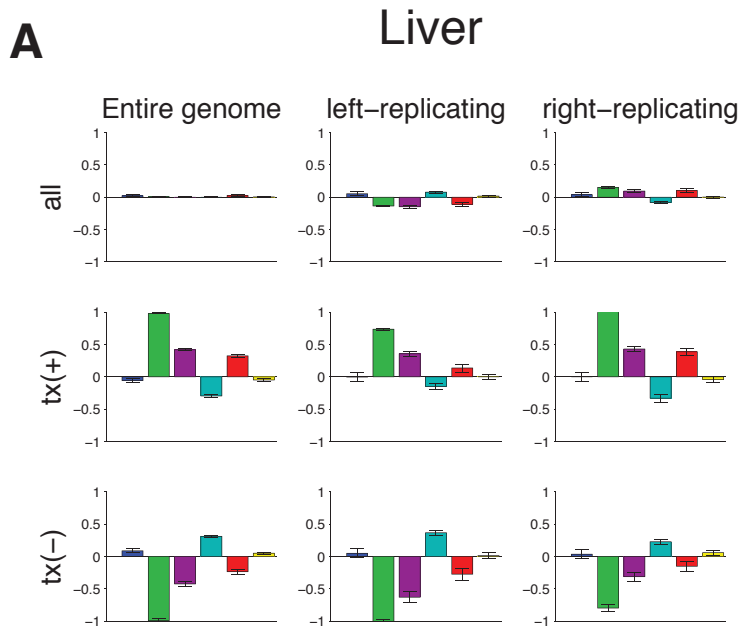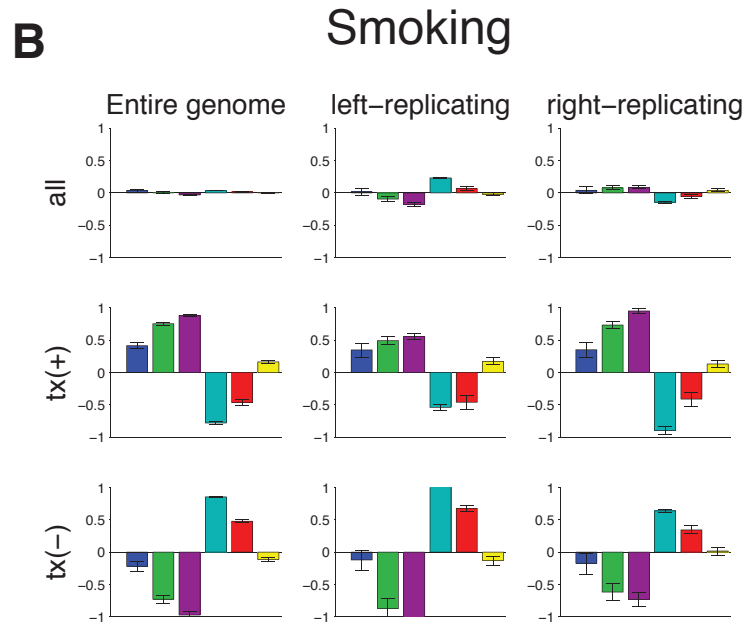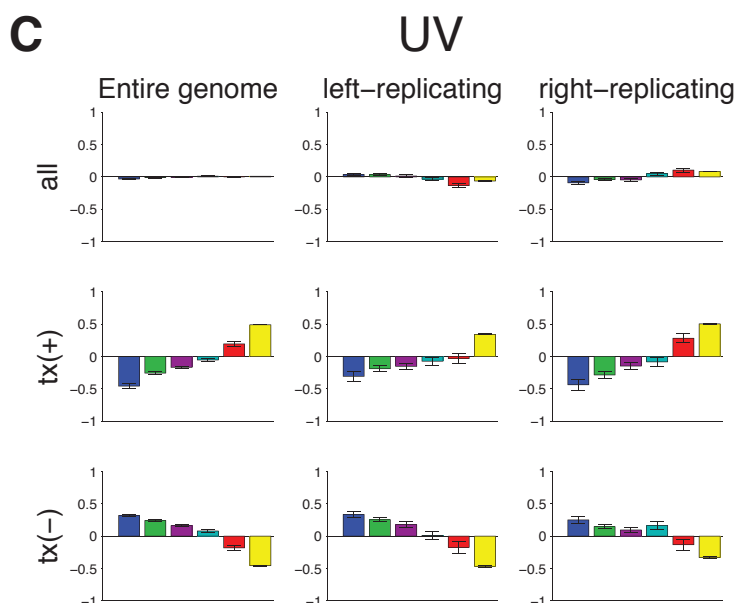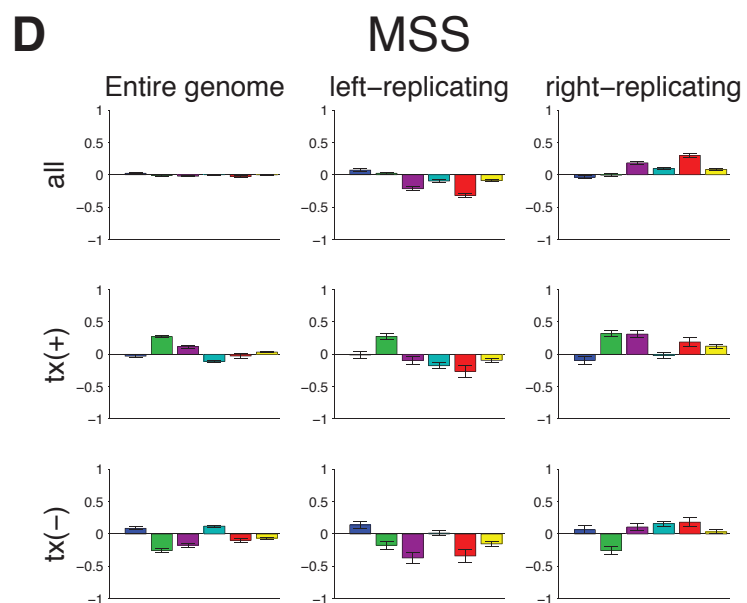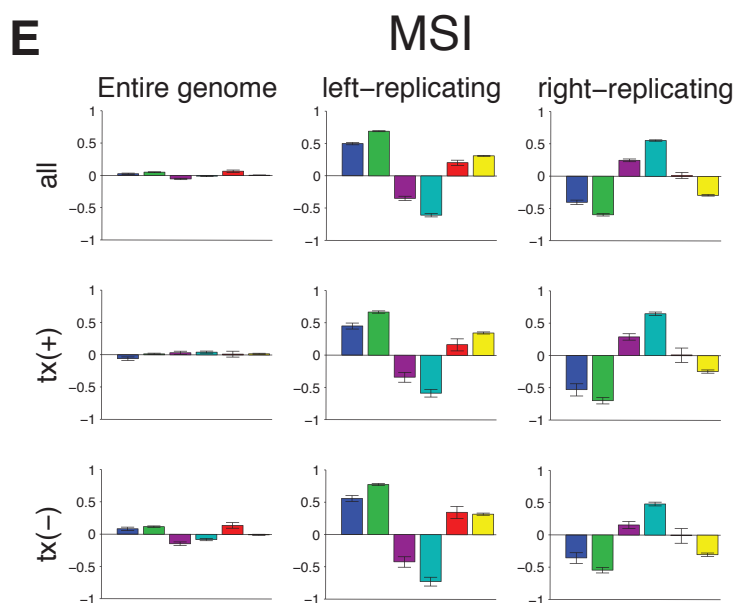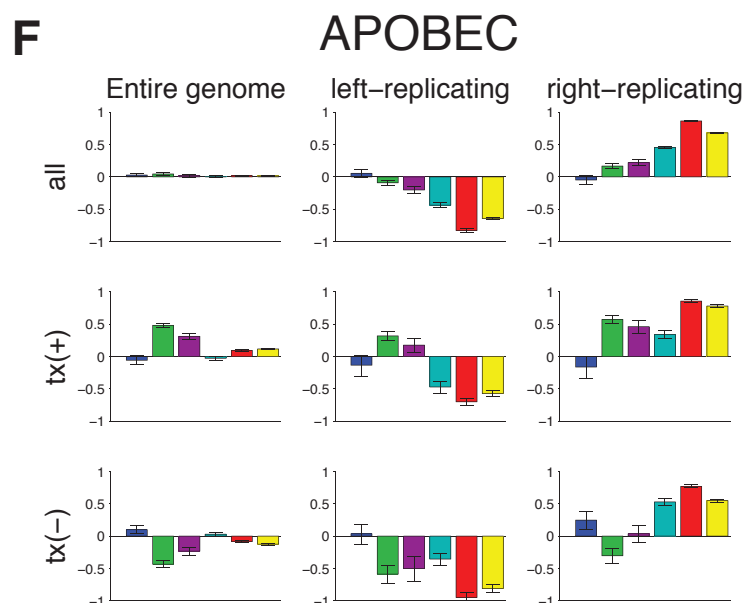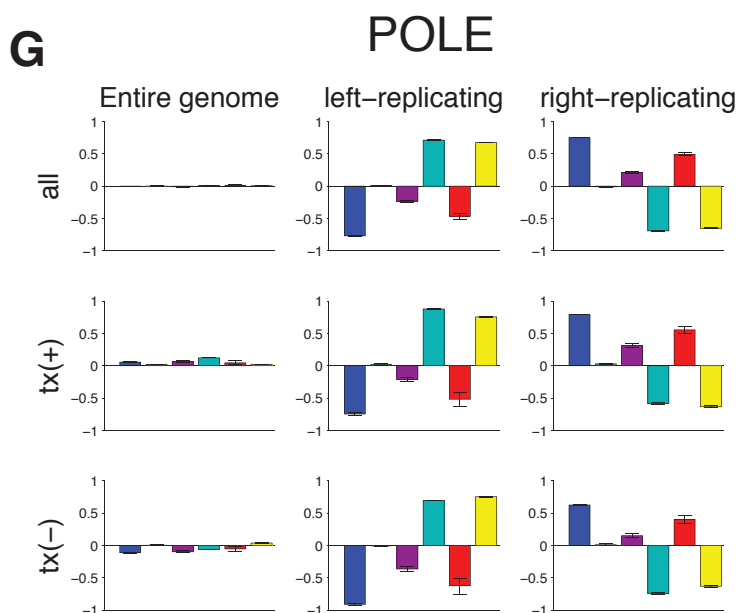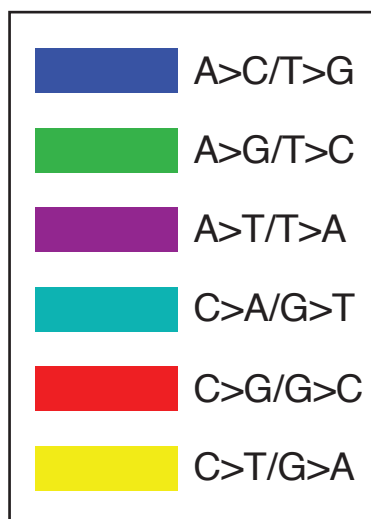

Supplement: NIHMS748835-supplement-5.pdf [file NIHMS748835-supplement-5.pdf]

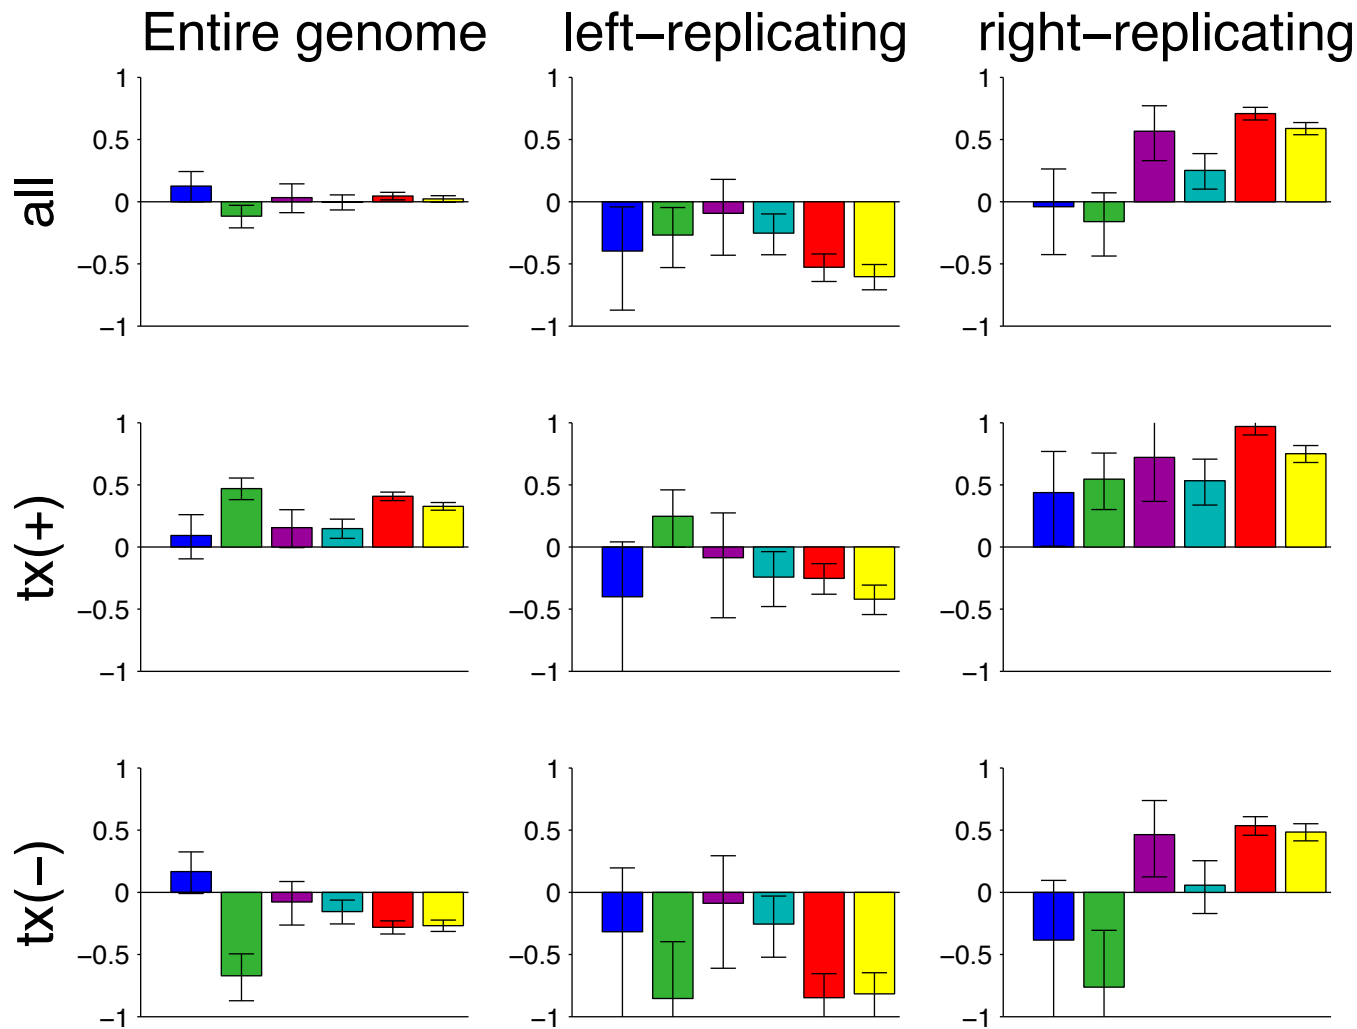

Supplement: NIHMS748835-supplement-6.pdf [file NIHMS748835-supplement-6.pdf]

C>G/T denovo mutation densities  
with respect to leading strand reference

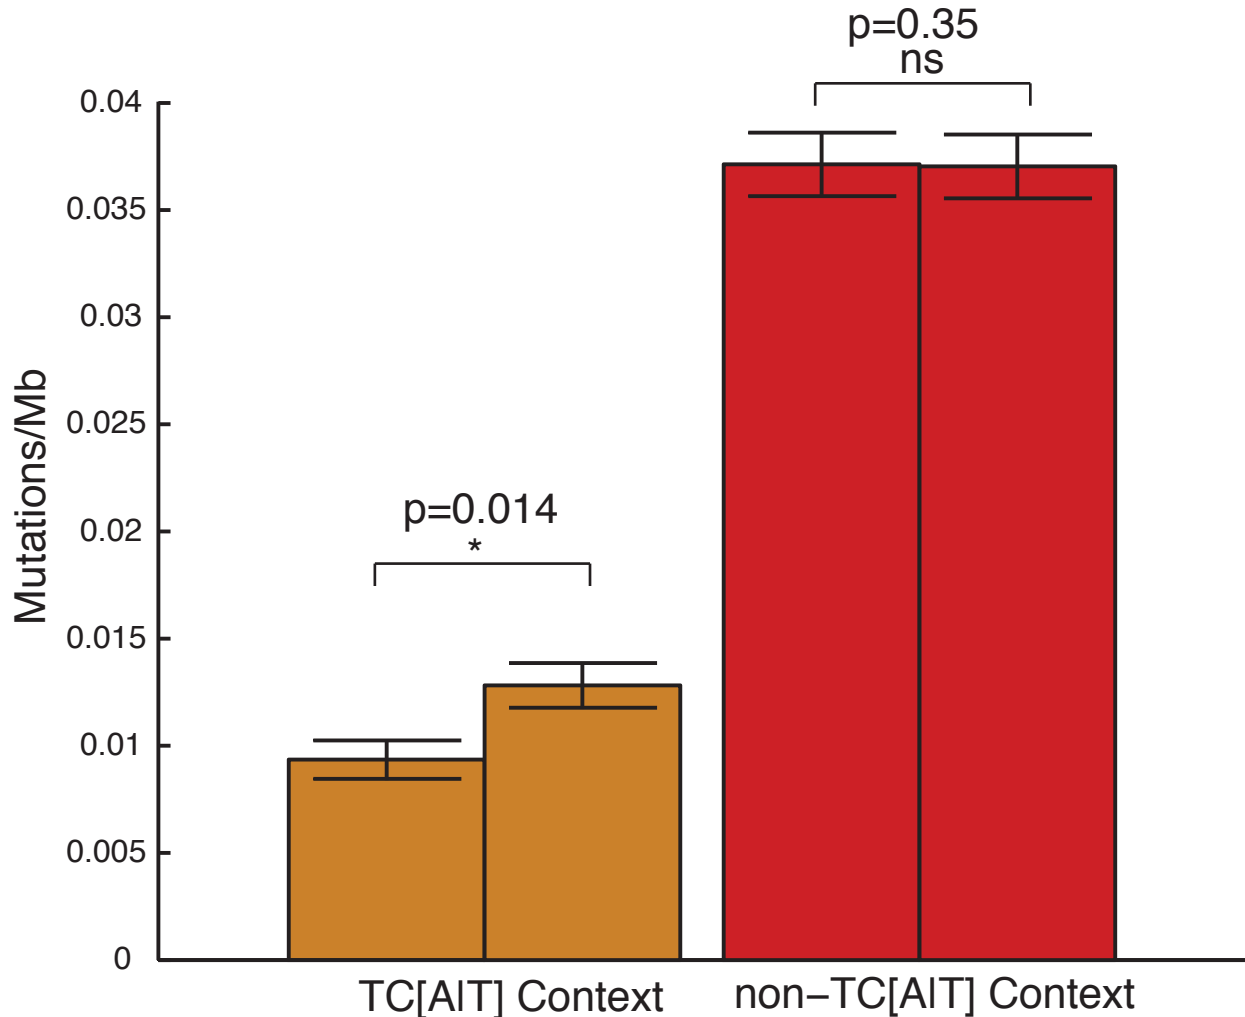

Supplement: NIHMS748835-supplement-7.pdf [file NIHMS748835-supplement-7.pdf]
